# Supplementary material for: Suspect and non-target screening: the last frontier in environmental analysis
Source: Royal Society of Chemistry journal article supplement (doi:10.1039/d1ay00111f), 2021-01-01
Supplement: d1ay00111f1.pdf [file d1ay00111f1.pdf]

## **Suspect and non-target screening: the last frontier in environmental analysis**

B. González-Gaya<sup>1,2</sup>, N. Lopez-Herguedas<sup>1,2</sup>, D. Bilbao<sup>1,2</sup>, L. Mijangos<sup>1,2</sup>, A.M. Iker<sup>1,2</sup>, N. Etxebarria<sup>1,2</sup>, M. Irazola<sup>1,2</sup>, A. Prieto<sup>1,2</sup>, M. Olivares<sup>1,2</sup>, O. Zuloaga<sup>1,2\*</sup>

1. Department of Analytical Chemistry, University of the Basque Country (UPV/EHU), 48940 Leioa, Basque Country, Spain

2. Research Centre for Experimental Marine Biology and Biotechnology, University of the Basque Country (PiE-UPV/EHU), 48620 Plentzia, Basque Country, Spain

\* Corresponding author (belen.gonzalez@ehu.eus)

SUPPLEMENTARY INFORMATION

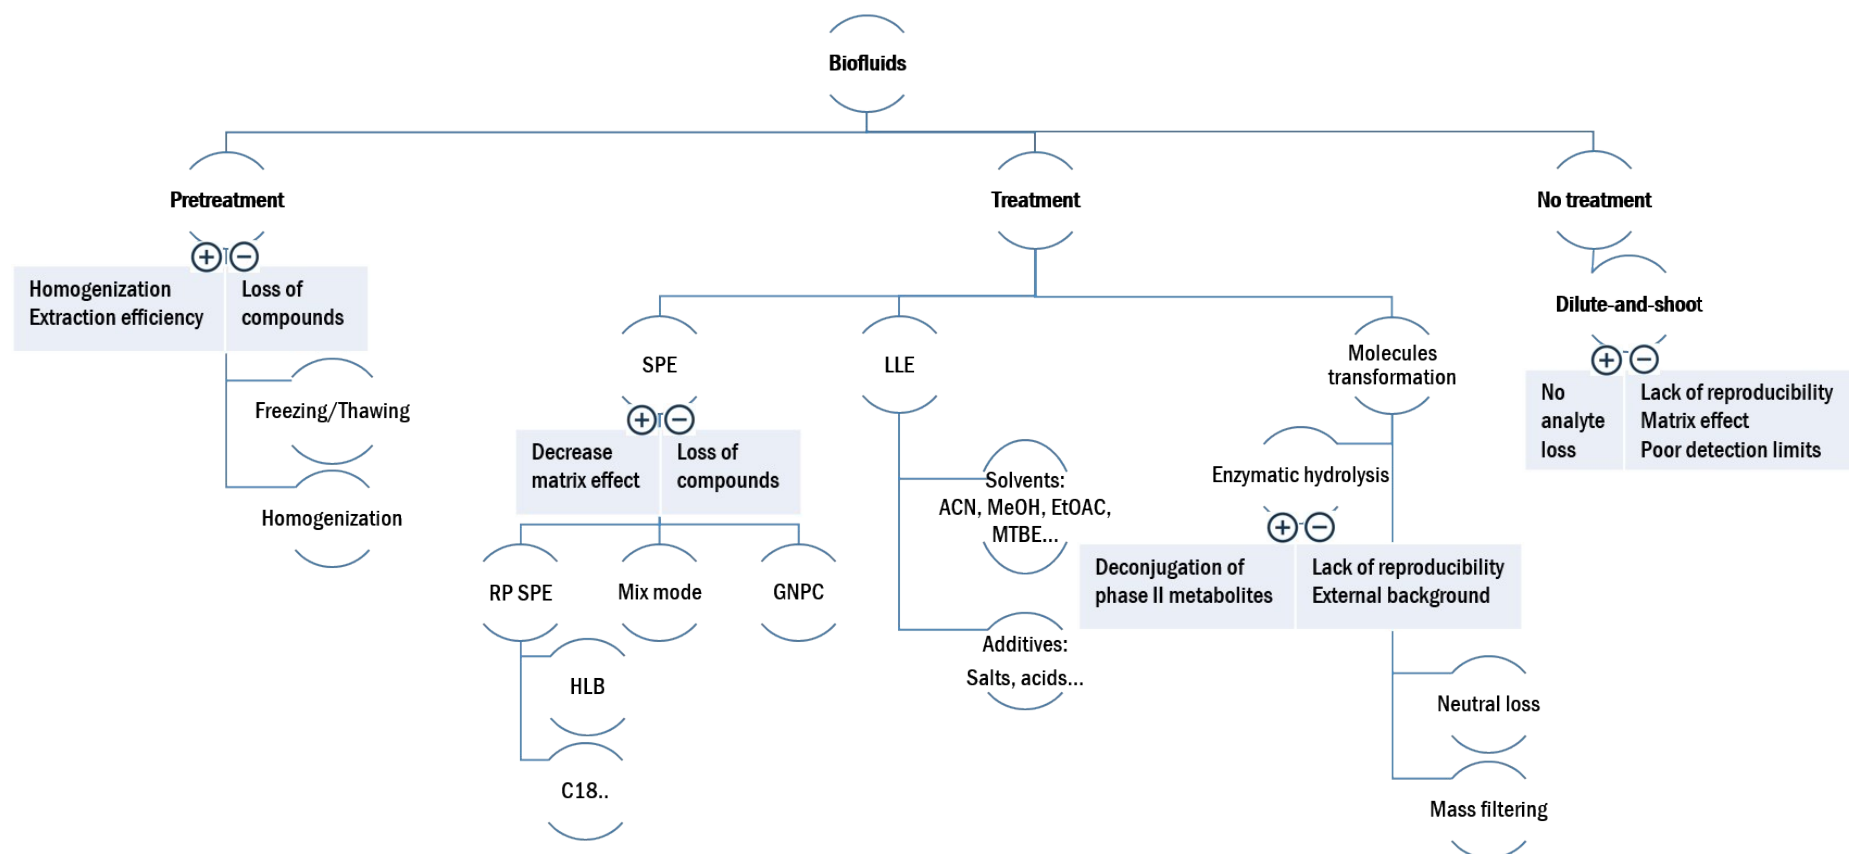

**Figure S1.** Critically evaluated (+ advantages and - constraints) biofluids samples treatment steps and methodologies.

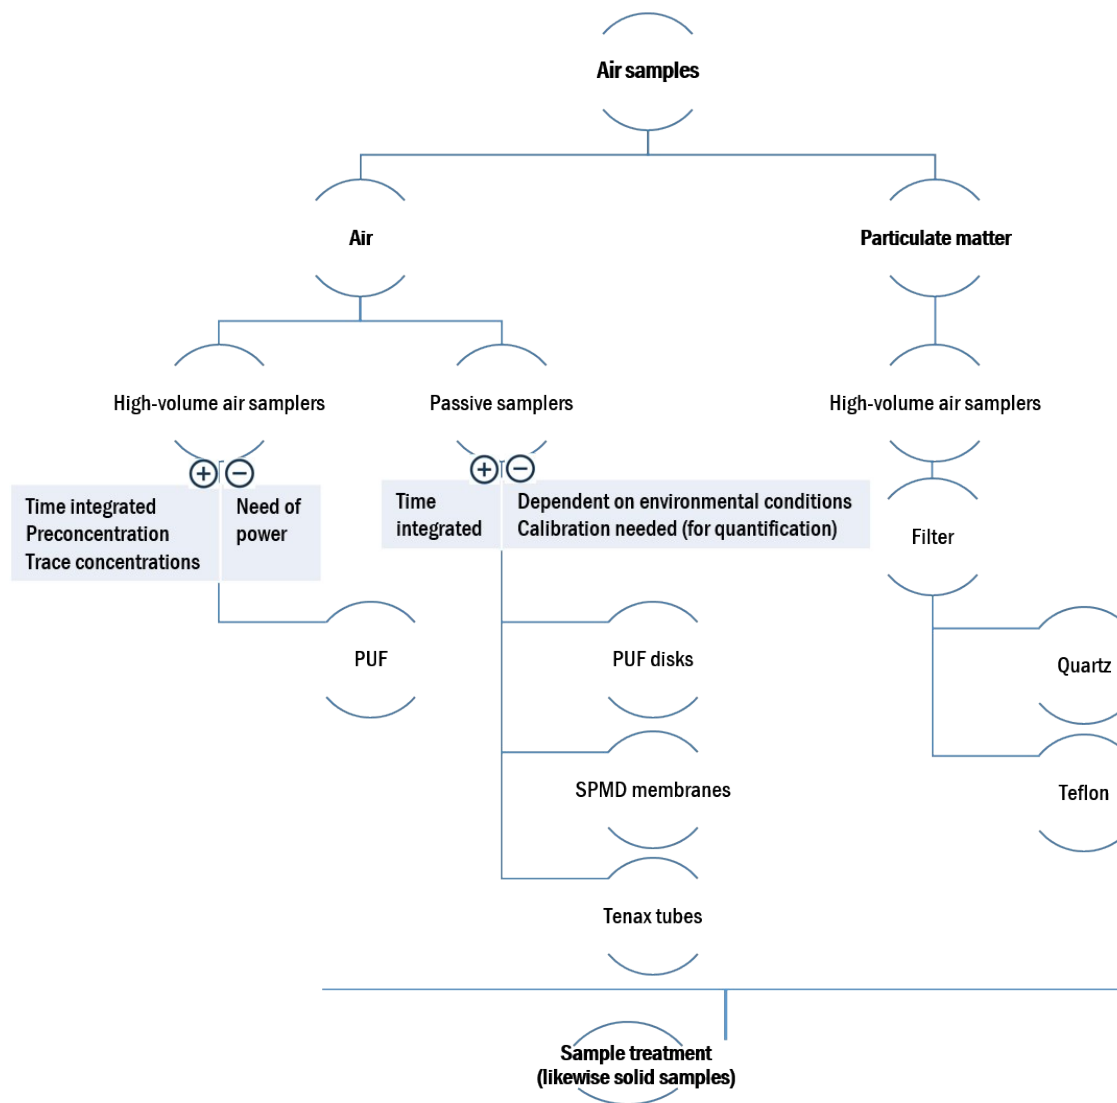

**Figure S2.** Critically evaluated (+ advantages and - constraints) atmospheric samples treatment steps and methodologies.
