# Supplementary material for: Suspect and non-target screening: the last frontier in environmental analysis
Source: Royal Society of Chemistry journal article supplement (doi:10.1039/d1ay00111f), 2021-01-01
Supplement: d1ay00111f2.xlsx [file d1ay00111f2.xlsx]

## Sheet: analysis and adquisition
Reference	Year	Reference title	Chromatography type	Column	Mobile phase or carrier gas	Mass analyzer	Ionization	Ionization polarity	Collision energy (CE)	Mass resolution (m/z)	Data adquisition mode. Independ data analysis (IDA), data dependet analysis (DDA)	Adquisition conditions	Mass spectrometer calibration conditions
Brüggen, S., & Schmitz, O. J.	2018	A New Concept for Regulatory Water Monitoring Via High-Performance Liquid Chromatography Coupled to High-Resolution Mass Spectrometry	LC	ZORBAX Eclipse Plus C18 (100 × 3 mm, 1.8 µm)	MeOH and Mili Q Water with formic acid	Sciex QTOF 5600+	ESI (DuoSpray)	PI & NI	40 eV and 15 eV	n.a.	IDA & DDA	• Scan range: 100-1200 full MS, 50-1000 MS/MS • In MS/MS mode, the 12 most intense masses • Cycle time of 0.78 s • Data-independent MS/MSall approach (SWATH acquisition)	Recalibration was done automatically after every three measurements using the calibration delivery system (CDS) via the APCI probe of the ion source
Bader, T., Schulz, W., Lucke, T., Seitz, W., & Winzenbacher, R.	2016	Application of Non-Target Analysis with LC-HRMS for the Monitoring of Raw and Potable Water: Strategy and Results	LC	Zorbax Eclipse Plus C18 (2.1 x 150 mm, 3.5 μm)	Mili Q Water and acetonitrie with formic acid	Sciex QTOF 5600+	ESI (DuoSpray)	PI & NI	Ramped from 25 to 55eV (high energy)		IDA & DDA	• Scan range: 100-1000 full MS, 30-1200 MS/MS • Maximun 12 adquisition per cycle • Exclusion list: detected contaminations (generated by injection 0 µL) • Survey scan accumulation time 250 ms
Carrizo, D., Domeño, C., Nerín, I., Alfaro, P., & Nerín, C.	2015	Atmospheric pressure solid analysis probe coupled to quadrupole-time of flight mass spectrometry as a tool for screening and semi-quantitative approach of polycyclic aromatic hydrocarbons, nitro-polycyclic aromatic hydrocarbons and oxo-polycyclic aromatic hydrocarbons in complex matrices	ASAP atmospherich presurre solid analysis (GC)	there is nochromatographic separation		Waters Xevo G2 QTOF	API	PI		>22500	DDA	• 70-800 full MS • scan time: 1 s • Inclusion list of PAH related compounds	The accuracy and reproducibility (referred to mass accuracy) of all analyses was guaranteed by using a Lockspray. Leucine-enkephalin, generating [MH]+ ions at 556.2771 Da was employed as the lock mass at a concentration of 2 ng mL−1
Croley, T. R., White, K. D., Wong, J., Callahan, J. H., Musser, S. M., Antler, M., ... & McGibbon, G. A.	2013	Combining targeted and nontargeted data analysis for liquid chromatography/high-resolution mass spectrometric analyses	LC	Kinetex™ C18 (2.1 x 100 mm, 1.7 μm)	Mili Q Water and Acetonitrile	Thermo Fisher TOF exactive	HESI	PI		50000	IDA & DDA	• Scan range: 50-1O00 full MS, 50-1000 MS/MS
Campos-Mañas, M. C., Plaza-Bolaños, P., Martínez-Piernas, A. B., Sánchez-Pérez, J. A., & Agüera, A.	2019	Determination of pesticide levels in wastewater from an agro-food industry: Target, suspect and transformation product analysis	LC	Poroshell 120 EC-C18 column 4.6 × 50 mm; 2.7 μm)	Mili Q Water with formic acid and acetonitrile	Sciex TripleTOF 5600+	ESI (DuoSpray)	PI	30 eV with a ±15 eV (high energy)		DDA	• Scan range: 50-1000 full MS, 50-1000 MS/MS • Peak intensity threshold of 1000 cps • Dynamic background subtraction • A 100 ms/scan accumulation time.
Aalizadeh, R., Nika, M. C., & Thomaidis, N. S.	2019	Development and application of retention time prediction models in the suspect and non-target screening of emerging contaminants	LC (RP & HILIC)	Acclaim RSLC C18 column (2.1 × 100 mm, 2.2 µm)& ACQUITY UPLC BEH Amide column (2.1 × 100 mm, 1.7 µm)	Mili Q Water, acetonitrile, MeOH with ammonium formiate	Bruker QTOF	ESI (DuoSpray)	PI & NI	4 ev (low energy) & 25 ev (MS/MS)	36000-40000 (m/z 2226.1593-702.8636)	IDA & DDA	• Scan range: 50-1000 full MS, 50-1000 MS/MS • Broadband collision induced dissociation (bbCID)	A QToF MS external calibration performed daily with a sodium formate solution, and a segment (0.1−0.25 min) in every chromatogram was used for internal calibration, using a calibrant injection at the beginning of each run.
Baduel, C., Mueller, J. F., Tsai, H., & Ramos, M. J. G.	2015	Development of sample extraction and clean-up strategies for target and non-target analysis of environmental contaminants in biological matrices	LC & GC	XDB-C18 (4.6 mm × 50 mm and 1.8 μm, NI) &XDB-C18 (2.1 mm × 100 mm and 1.8 μm, PI)	MeOH, Mili Q Water with ammonium acetate and formic acid	Sciex TripleTOF 5600+	ESI	PI & NI	10 ev & 35 ± 15 eV	30000 (m/z 956)	DDA	• Scan range: 100-950 full MS, 30-950 MS/MS • The 10 most intense masses per cycle • Intensity threshold of 500 cps • Mass tolerance of 10 ppm • Dynamic background subtraction	Mass calibration and resolution adjustments were performed automatically using a 10−5 mol L−1 solution of poly (propylene glycol) introduced via a syringe pump and connected to the interface. & an automated external calibration system for mass accuracy with an injector system (CDS, calibrant Delivery System Status) and an internal auto calibration by means of an interactive recalibration tool bas…
Carpenter, C. M., Wong, L. Y. J., Johnson, C. A., & Helbling, D. E.	2018	Fall Creek Monitoring Station: Highly Resolved Temporal Sampling to Prioritize the Identification of Nontarget Micropollutants in a Small Stream	LC	XBridge C18 (2.1 × 50 mm, 3.5 μm)	Mili Q Water and MeOH	Thermo Qexactive	ESI	PI		140000 (200 M/Z, MS) & 14500 (200 m/z, MS/MS)	DIA & DDA	• Full MS and MS/MS in diferent injection runs • Scan range: 100-1000 full MS, 100-1000 MS/MS • In-house inclusion list (temporal profiles) & the most intence MS features if the inclusion list was not triggered • Three MS/MS per full scan • 8s dynamix exclusion • 1 m/z isolation window
Brunner, A. M., Bertelkamp, C., Dingemans, M. M., Kolkman, A., Wols, B., Harmsen, D., ... & ter Laak, T. L.	2020	Integration of target analyses, non-target screening and effect-based monitoring to assess OMP related water quality changes in drinking water treatment	LC	XBridge BEH C18 XP (2.1 × 150 mm, 2.5 μm)	Acetonitrile, Mili Q Water with formic acid	Thermo Orbitrap	HESI	PI & NI	High Collision Dissociation (HCD) energy of 35%	120000 (MS) & 15000 (MS/MS)	DDA	• Scan range: 80-1300 full MS, 100-1000 MS/MS • Mass tolerance of 5 ppm • In house parent and TP inclusion list	calibration solution (Pierce) to ensure a mass error smaller than 2 ppm.
Bader, T., Schulz, W., Kümmerer, K., & Winzenbacher, R.	2017	LC-HRMS Data Processing Strategy for Reliable Sample Comparison Exemplified by the Assessment of Water Treatment Processe	LC	Zorbax Eclipse Plus C18 (2.1 × 150 mm, 3.5 μm)	Mili Q water with formic acid and acetonitrile	Sciex QTOF 5600+	ESI (DuoSpray)	PI	10 eV		IDA & DDA	• Scan range: 80-1300 full MS & MS/MS •250 ms survey scan accumulation time •MS/MS most intense ions (DDA) & SWATH (DIA)
Bogialli, S., Bortolini, C., Di Gangi, I. M., Di Gregorio, F. N., Lucentini, L., Favaro, G., & Pastore, P.	2017	Liquid chromatography-high resolution mass spectrometric methods for the surveillance monitoring of cyanotoxins in freshwaters	LC	Accucore C-18 (2.1 × 100 mm, 2.6 μm)	Mili Q water and acetonitrile with fomic acid	Agilent QTOF 6520	ESI	PI	15, 20 and 60 eV		DDA	• Scan range: 50-300 full MS, 100-1000 MS/MS • Scan rate: 2 scans/s (full MS scan) & 8 scan/s (MS/MS) • In-house inclusion list (MS and MS/MS in different injections) •Dynamix exclusion after 100 spectra and 0.3 min • Intensity threshold 500 cps	The QTOF calibration was daily performed with the manufacturer's solution. For all chromatographic runs, the ionic signal at m/z 391.2843 relative to the diisooctyl phthalate was set as lock mass
Brunner, A. M., Vughs, D., Siegers, W., Bertelkamp, C., Hofman-Caris, R., Kolkman, A., & ter Laak, T.	2019	Monitoring transformation product formation in the drinking water treatments rapid sand filtration and ozonation		XBridge BEH C18 XP (2.1 × 150 mm, 2.5 μm)	Acetonitrile and Mili Q water with formic acid	Thermo Q-Orbitrap	ESI	PI & NI	35 % (HCD)	120000 (MS) & 15000 (MS/MS)	DDA	• Scan range: 50-1000 full MS, 100-1000 MS/MS • Data dependet for the height most intense ions & In-houise TP inclusion list	With every batch run mass calibration was performed using Pierce ESI positive and negative ion calibration solution to ensure a mass error smaller than 2 ppm
Chung, I. Y., Park, Y. M., Lee, H. J., Kim, H., Kim, D. H., Kim, I. G., ... & Kwon, J. H.	2017	Nontarget screening using passive air and water sampling with a level II fugacity model to identify unregulated environmental contaminants	GC x GC	DB-5MS (0.25 mm × 30 m, 0.25 μm) x Rtx-1701 (0.10 mm × 1 m, 0.10 μm)	Helium	Pegasus TOF	EI		70 eV			• Scan range: 35-550 full MS • Adquisition rate: 100 spectra/s
Bergé, A., Buleté, A., Fildier, A., Mailler, R., Gasperi, J., Coquet, Y., ... & Vulliet, E.	2018	Non-target strategies by HRMS to evaluate fluidized micro-grain activated carbon as a tertiary treatment of wastewater	LC	Acclaim RSLC C18 (2.1 × 150 mm, 2.2 μm)	Mili Q water and MeOH with ammonium formiate and formic acid	Bruker QTOF	ESI	PI & NI	5 eV (low energy) & 40 eV (high energy)	25000 (m/z 430.9136)	IDA & DDA	• Scan range: 80-1000 full MS,80-1000 MS/MS •MS/MS: three most adundant precursos ions per scan (data dependetI) & bbCID (data independent)	. A solution of sodium formate and acetate (10 mM) clusters was used for external calibration at the beginning of each run
Choi, Y., Kim, K., Kim, D., Moon, H. B., & Jeon, J.	2020	Ny-Ålesund-oriented organic pollutants in sewage effluent and receiving seawater in the Arctic region of Kongsfjorden	LC	Xbridge C18 (2.1 × 50 mm, 3.5 μm)	Mili Q water and MeOH with formic acid	Thermo Q-Exactive plus	HESI	PI & NI			IDA & DDA	• Scan range: 80-1500 full MS •MS/MS: in-house inclusion list
Challis, J. K., Almirall, X. O., Helm, P. A., & Wong, C. S.	2020	Performance of the organic-diffusive gradients in thin-films passive sampler for measurement of target and suspect wastewater contaminants	LC			waters Xevo G2-XS QTOF	ESI	PI		25000 (556.2765 m/z)	DDA	• Scan range: 100-900 full MS, 100-1000 MS/MS • 4 scans/s • Intensity threshold of 10000 • Maximun of 15 precursor/scan based on intensity •MS/MS adquisition accumulation: 100000 counts or 0.25 s	External mass calibration was performed with sodium formate to less than 1 ppm throughout the entire acquisition range. Collected mass spectra were continuously lockmass corrected with leucine enkephalin to a final mass accuracy no greater than 2 ppm.
Aalizadeh, R., Thomaidis, N. S., Bletsou, A. A., & Gago-Ferrero, P.	2016	Quantitative Structure–Retention Relationship Models To Support Nontarget High-Resolution Mass Spectrometric Screening of Emerging Contaminants in Environmental Samples	LC	RSLC C18 (2.1 × 100 mm, 2.2 μm)	Mili Q water and MeOH with ammonium formiate and formic acid	Bruker QTOF	ESI	PI & NI	4 (low energy) and 15 eV (high energy)	36000−40000	IDA & DDA	• Scan range: 50-1000 full MS, 100-1000 MS/MS • MS/MS: bbCID (DIA) & NORMAN emerging compound inclusion list (DDA)	External calibration done daily and internal calibration using a calibrant injection at the beginning of each injection.
Chiaia-Hernandez, A. C., Krauss, M., & Hollender, J.	2013	Screening of Lake Sediments for Emerging Contaminants by Liquid Chromatography Atmospheric Pressure Photoionization and Electrospray Ionization Coupled to High Resolution Mass Spectrometry	LC	X-bridge C18 (2.1 × 50 mm, 2.2 μm)	MeOH and Mili Q water with formic acid and isopropanol	Thermo LTQ-Obitrap	ESI and APPI	PI & NI	normalized %35	Full MS 6000 (m/z 400) & MS/MS 7500 (m/z 400)	DDA	• Scan range: 115-1000 full MS, 100-1000 MS/MS
Ccanccapa-Cartagena, A., Pico, Y., Ortiz, X., & Reiner, E. J.	2019	Suspect, non-target and target screening of emerging pollutants using data independent acquisition: Assessment of a Mediterranean River basin	LC	Luna C18 (2.1 × 100 mm x 1.7 μm)	Mili Q water and MeOH with formic acid	Water Xevo-G2-S QTOF	HESI	PI	4 eV (low energy) and ramped from 4 to 45 eV (high energy)	>24000	IDA & DDA	• Scan range: 100-1200 full MS, 100-1000 MS/MS • 4 scans/s • DIA (MSE) • DDA: inclusion list created with DIA	During data acquisition, the reference m/z556.2771 was used for real-time corrections using an external reference (Lock-Spray™, m/z ) consisting of leucine-enkephalin infused continuously at 10 mL min−1 via a lock spray interface.
Assress, H. A., Nyoni, H., Mamba, B. B., & Msagati, T. A.	2019	Target quantification of azole antifungals and retrospective screening of other emerging pollutants in wastewater effluent using UHPLC –QTOF-MS	LC	Acquity BEH C18 (2.1 × 100 mm x 1.7 μm)	Mili Q water and acetonitrile with fomic acid	Bruker Impact II QTOF	ESI	PI			IDA & DDA	• Scan range: 50-1600 full MS, 100-1000 MS/MS •Inclusion list	Sodium formate cluster was used to calibrate the MS instrument. The calibrant was infused in front of the LC for each sample run and used for mass recalibration as well as calculating the mass accuracy.
Beckers, L. M., Brack, W., Dann, J. P., Krauss, M., Müller, E., & Schulze, T.	2020	Unraveling longitudinal pollution patterns of organic micropollutants in a river by non-target screening and cluster analysis	LC	Kinetex EVO C18 (2.1 × 50 mm x 2.6 μm)	Mili Q water, MeOH, acetone and isopropanol with formic acid & deuterium oxide and methan-d1-ol	Thermo Q Exactive Plus	HESI	PI & NI	35 and 55 (high energy)	DIA: Fulll MS 140000 (200 m/z) DDA: Full scan 70000 & 35000 (200 m/Z)	IDA & DDA	• Scan range: 100-1000 full MS, 100-1000 MS/MS • Inclusion list • Hydrogen-deuterium exchange •pH-dependent LC retention
Chiaia-Hernández, A. C., Günthardt, B. F., Frey, M. P., & Hollender, J.	2017	Unravelling contaminants in the anthropocene using statistical analysis of liquid chromatography−high-resolution mass spectrometry nontarget screening data recorded in lake sediments	LC			Thermo Qexactive	ESI	PI & NI	normalized collision energies 95, 100, 105 % (High energy)	Full MS 140000 (m/z 400) & MS/MS 17500 (m/z 400)	IDA & DDA	• Scan range: 100-1100 full MS, 100-1000 MS/MS • DDA: Inclusion list • DIA, overlapping mass isolation windows: 95-155 m/z, 150-190 m/z, 185-225 m/z, 220-260 m/z, 255-295 m/z, 290-330 m/z, 325- 365 m/z, 360-400 m/z and 395-1005 m/
Alygizakis, N. A., Gago-Ferrero, P., Hollender, J., & Thomaidis, N. S.	2019	Untargeted time-pattern analysis of LC-HRMS data to detect spills and compounds with high fluctuation in influent wastewater	LC	Acclaim RSLC C18 (2.1 × 100 mm, 2.2 μm)	Mili Q water and MeOH with ammonium formiate and formic acid	Bruker QTOF	ESI	PI & NI	4 and 25 eV		IDA & DDA	• Scan range: 50-1000 full MS, 100-1000 MS/MS • DIA-bbCID • DDA: A second data-dependent MS/MS acquisition was conducted using inclusion list
Du, B., Lofton, J. M., Peter, K. T., Gipe, A. D., James, C. A., McIntyre, J. K., ... & Kolodziej, E. P.	2017	Development of suspect and non-target screening methods for detection of organic contaminants in highway runoff and fish tissue with high-resolution time-of-flight mass spectrometry	LC	ZORBAX Eclipse Plus C18 (2.1 × 100 mm, 1.8 μm)	Mili Q water and MeOH with ammonium acetate and acetic acid	Agilent 6530 QTOF	ESI	PI & NI		6000-12400	DDA	• Scan range: 50-17 full MS, 50-1700 MS/MS • Adquisition: MS 3 spectra/s & MS/MS 1 spectra/s	Detector performance was monitored by checking mass accuracy and re-tuned or re-calibrated if mass error exceeded 2 ppm. A mixture of reference standards, each at 100 ng mL−1, containing cotinine d3 (RT 3.42 min), carbamazepine 13C15N (RT 6.47 min), and prometryn (RT 9.43 min) was analyzed every 8–10 samples to check chromatography and sensitivity during data acquisition. We also validated consis…
Dürig, W., Kintzi, A., Golovko, O., Wiberg, K., & Ahrens, L.	2020	New extraction method prior to screening of organic micropollutants in various biota matrices using liquid chromatography coupled to high-resolution time-of-flight mass spectrometry	LC	ACQUITY UPLC HSS T3-C18c PI and ACQUITY UPLC BEH-C18 (2.1 mm × 100 mm, 1.7 μm) NI	Mili Q water and acetonitrile with ammonium formiate and formic acid	Waters Xevo G2-S QTOF	ESI	PI & NI	4 eV (low energy) and ramped from 10 to 45 eV (high energy)		IDA & DDA	• Scan range: 100-1200 full MS, 50-1700 MS/MS • DIA: MSE	Leucine enkephalin was continuously infused for lock mass correction
Emke, E., Vughs, D., Kolkman, A., & de Voogt, P.	2018	Wastewater-based epidemiology generated forensic information: Amphetamine synthesis waste and its impact on a small sewage treatment plant	LC	XBridge BEH C18 (2.1 mm × 150 mm, 2.1 μm)	Mili Q water and acetonitrile with formic acid	Thermo LTQ- Q Obitrap	ESI	PI	High energy normalized at 35%	Full MS 120000 (m/z 400) & MS/MS 15000 (m/z 400)	DDA	• Scan range: 65-1300 full MS, 50-1700 MS/MS •inclusion list.
Gago-Ferrero, P., Bletsou, A. A., Damalas, D. E., Aalizadeh, R., Alygizakis, N. A., Singer, H. P., ... & Thomaidis, N. S.	2020	Wide-scope target screening of >2000 emerging contaminants in wastewater samples with UPLC-Q-ToF-HRMS/MS and smart evaluation of its performance through the validation of 195 selected representative analytes	LC	Acclaim RSLC C18 (2.1 × 100 mm, 2.2 μm)	Mili Q water and MeOH with ammonium formiate and formic acid	Bruker QTOF	ESI	PI & NI	4 (low energy) and 25 eV (high energy)	36000–40000	DIA	• Scan range: 50-1000 full MS, 50-1000 MS/MS •DIA: bbCID • Scan rate 2 Hz	external calibration was daily performed with a sodium formate solution,
Gago-Ferrero, P., Schymanski, E. L., Bletsou, A. A., Aalizadeh, R., Hollender, J., & Thomaidis, N. S.	2015	Extended Suspect and Non-Target Strategies to Characterize Emerging Polar Organic Contaminants in Raw Wastewater with LC-HRMS/MS	LC (RP & HILIC)	Acclaim RSLC C18 (2.1 x 100 mm, 2.2 µm) & ACQUITY UPLC BEH Amide (2.1 × 100 mm, 1.7 µm)	Mili Q water, MeOH with ammonium formiate, formic acid and ammonium acetate	Bruker QTOF	ESI	PI & NI	Predefined values	36000-40 000	DDA	• Scan range: 50-1000 full MS, 50-1000 MS/MS •DIA: bbCID • Scan rate 2 scan/s DDA: AutoMS acquisition mode	A QTOF external calibration was performed daily with the manufacturer's solution
Gallen, C., Heffernan, A. L., Kaserzon, S., Dogruer, G., Samanipour, S., Gomez-Ramos, M. J., & Mueller, J. F.	2019	Integrated chemical exposure assessment of coastal green turtle foraging grounds on the Great Barrier Reef	LC & GC	DB-5MS (30m × 0.25mm, 0.25μm GC) and Gemini-NX C18 (2.0 × 50 mm, 3 µm, LC)	Mili Q water, MeOH with acetic acid / Helium	Q Exactive Orbitrap (GC) and Sciex QTOF 5600+ (LC)	ESI (LC) /EI (GC)	PI & NI	10 eV (low energy), ramped EC 35±15 eV (high energy)	8000 (GC)	DDA (LC) & IDA (GC)	GC-HR • Scan range: 50-600 full MS •Scan rate: 2 LC-HR • Scan range: 30-950 full MS, 30-950 MS/MS • Maximum of 10 candidate ions to monitor per cycle. • Intensity threshold of 500 cps • Mass tolerance of 10 ppm	Mass calibration and resolution adjustments were performed automatically using an external calibration system (Supplementary Material), and an internal interactive recalibration tool based on the common background ions found.
Giorio, C., Bortolini, C., Kourtchev, I., Tapparo, A., Bogialli, S., & Kalberer, M.	2019	Direct target and non-target analysis of urban aerosol sample extracts using atmospheric pressure photoionisation high-resolution mass spectrometry	LC	direct infusion	direct infusion	Termo LTQ Orbitrap	APPI & NanoESI	PI & NI		100000			The mass spectrometer (fitted with an ESI source) was calibrated before the analysis using a Pierce LTQ Velos ESI Positive Ion Calibration Solution and a Pierce ESI Negative Ion Calibration Solution (Thermo Scientific).
Gerona, R. R., Schwartz, J. M., Pan, J., Friesen, M. M., Lin, T., & Woodruff, T. J.	2018	Suspect screening of maternal serum to identify new environmental chemical biomonitoring targets using liquid chromatography–quadrupole time-of-flight mass spectrometry	LC	Poroshell 120 C18 (2.1 × 100 mm, 2.7 um)	Mili Q water and MeOH with ammonium acetate	Agilent QTOF 6550	ESI	NI			DDA	• Scan range: 80-660 full MS DDA: automate MS/MS mode • 3 most intense candidate ions to monitor per cycle. • Intensity threshold of 500 cps • Mass tolerance of 10 ppm
Grigoriadou, A., & Schwarzbauer, J.	2011	Non-target Screening of Organic Contaminants in Sediments from the Industrial Coastal Area of Kavala City (NE Greece)	GC	BPX5 (0.25 mm x 30m, 0.25 μm)	Hydrogen	MS	EI	PI	70 eV	1000	non-targeted	• Scan range: 30-700 full MS • Maximum of 10 candidate ions to monitor per cycle. • Inter-scan time 0.1s
Grung, M., Kringstad, A., Bæk, K., Allan, I. J., Thomas, K. V., Meland, S., & Ranneklev, S. B.	2017	Identification of non-regulated polycyclic aromatic compounds and other markers of urban pollution in road tunnel particulate matter	GC	DB-5 MS (0.25 mm x 30m, 0.25 μm)	Helium	Waters GCT Premier QTOF	EI	PI			suspect and non-targeted	• Scan range: 50-800 full MS • 20' most intense candidate ions to monitor per cycle (peak width at 5% height) • Intensity threshold of 800 (peak-to-peak baseline noise). • Exclusion list: the blank sample for silicone rubber
Hashimoto, S., Zushi, Y., Fushimi, A., Takazawa, Y., Tanabe, K., & Shibata, Y.	2013	Selective extraction of halogenated compounds from data measured by comprehensive multidimensional gas chromatography/high resolution time-of-flight mass spectrometry for non-target analysis of environmental and biological samples	GC x GC	GL Science InertCap 5MS/Sil (0.25 mm x 60m, 0.1 μm) and SGE BPX-50 (0.1 mm x 1.5m, 0.1 μm) SGE BPX-50	Helium	JEOL JMS-T100GC TOFMS	EI	PI	35	6000		• Scan range: 35-550 full MS • Scan cycle 25 Hz
Hedgespeth, M. L., Gibson, N., McCord, J., Strynar, M., Shea, D., & Nichols, E. G.	2019	Suspect screening and prioritization of chemicals of concern (COCs) in a forest-water reuse system watershed	LC	Waters Cortecs T3 (3 × 100 mm, 2.7 μm)	Mili Q water with MeOH and ammonium formiate	Agilent 6210 TOF	ESI	PI & NI				• Scan range: 150-1000 full MS • scan time 0.3 s • Centroid and profile data format • Data collection 4 GHz
Hinnenkamp, V., Balsaa, P., & Schmidt, T. C.	2019	Quantitative screening and prioritization based on UPLC-IM-Q-TOF-MS as an alternative water sample monitoring strategy	LC	A HSS T3 (2.1 × 100 mm, 1.8 μm)		IM-QTOF	ESI	PI & NI	4 eV (low energy) & CE ramp from 15 to 40 eV (high energy)		IDA & DDA	• Scan range: 50-1000 full MS • scan time 0.3 s • IM is used	Leucin enkephalin was used as lock mass and continuously infused (5 μL/min) via reference probe.
Höcker, O., Bader, T., Schmidt, T. C., Schulz, W., & Neusüß, C.	2020	Enrichment-free analysis of anionic micropollutants in the sub-ppb range in drinking water by capillary electrophoresis-high resolution mass spectrometry	Capillary electrophoresis	bare fused silica capillary (50 µm x 60 cm)	isopropanol, water, formic acid	Thermo Orbitrap	ESI	NI	high collision dissociation (stepped 15, 30, and 45%),	3000		• Scan range: 75-510 full MS & 50-510 MS/MS • Accumulation time: 64 ms • MS/MS isolation 1.6 Da window
Hohrenk, L. L., Vosough, M., & Schmidt, T. C.	2019	Implementation of Chemometric Tools to Improve Data Mining and Prioritization in LC-HRMS for Nontarget Screening of Organic Micropollutants in Complex Water Matrixes	LC	Atlantis T3 (2.1 x 150 mm, 3 μm)	Mili Q water, MeOH with formic acid	Thermo Qexactive Qorbitrap	ESI	PI	normalized CE 30 & 60 (high energy)	70000 (Full MS) & 17500 (MS/MS)	IDA & DDA	• Scan range: 100-1000 full MS & 100-1000 MS/MS • 5 most intense candidate ions to monitor per cycle. • Intensity threshold of 2000 cps • Isolation window 2 m/z	Mass calibration was performed with the calibration solution (Pierce LTQ Velos Positive/Negative Ions Calibration Solution
Hug, C., Ulrich, N., Schulze, T., Brack, W., & Krauss, M.	2014	Identification of novel micropollutants in wastewater by a combination of suspect and nontarget screening	LC	Kinetex Core-Shell C18 (100 mm × 3.0 mm; 2.6 µm)	Mili Q water and MeOH with formic acid & deuterium oxide and tetradeuteromethanol	Thermo LTQ Orbitrap XL	ESI	PI & NI	normalized CE at 35 and 50% (low energy) and normalized CE at 50, 70, 90 and 120 % (high energy)	60000 (m/Z 400, Full MS) & 15000 (m/Z 400, MS/MS)	IDA & DDA	• Scan range: 100-1000 full MS & 100-1000 MS/MS • Inclusion list • Intensity threshold of 50000 cps • Isolation window 2 m/z • Masss acuracy < 5 ppm • Isolation width of 1.3 m/z	External mass calibration using a calibration solution for the range from 138 to 1721 m/z
Pena-Abaurrea, M., Jobst, K. J., Ruffolo, R., Shen, L., McCrindle, R., Helm, P. A., & Reiner, E. J.	2014	Identification of Potential Novel Bioaccumulative and Persistent Chemicals in Sediments from Ontario (Canada) Using Scripting Approaches with GC×GC-TOF MS Analysis	GC X GC	Rtx-5MS (0.25 mm x 30 m, 0.25 µm) and BPX-50 (0.15 mm x 1.6 m, 0.55 µm)	Helium	Waters QTOF and Varian 920-MS FCTIR	EI	NI	70 eV	7000 (TOF) & 50000-100000 (FTMS)		• Scan range: 50-1000 full MS (QTOF) & 150-650 full MS (FTMS)	A compromised mass defect value of −60/100 Da was used in order to adjust the MS bin window during MS detection and to avoid distortion of the isotope cluster of the high halogenated-substituted compounds.
Jeon, J., & Hollender, J.	2019	In vitro biotransformation of pharmaceuticals and pesticides by trout liver S9 in the presence and absence of carbamazepine	LC	Waters Atlantis T3 (3 × 150 mm)	Mili Q water, MeOH with formic acid	Thermo Q Exactive Orbitrap	ESI	PI & NI		70000 (full MS) & 35000 (MS/MS)	DDA	• Scan range: 100-1000 full MS & 100-1000 MS/MS • Inclusion list (predicted metabolites) • 5 most intes¡nse ions at each scan if no mass from the inclusion list was found • Dynamic exclusion: 3 s	External mass calibration
Jeon, J., Kurth, D., & Hollender, J.	2013	Biotransformation Pathways of Biocides and Pharmaceuticals in Freshwater Crustaceans Based on Structure Elucidation of Metabolites Using High Resolution Mass Spectrometry	LC	Waters Atlantis T3 (3 × 150 mm)	Mili Q water, MeOH with formic acid	Thermo Q Exactive Orbitrap	ESI	PI & NI		60000 (full MS) & 7500 (MS/MS)	DDA	• Scan range: 150-2000 full MS & 100-1000 MS/MS • Masss acuracy < 5 ppm • Inclusion list (predicted metabolites) • 5 most intes¡nse ions at each scan if no mass from the inclusion list was found • Dynamic exclusion: 10 s	External mass calibration was used to ensure a mass accuracy of <5 ppm over the MS mass range
Mollerup, C. B., Mardal, M., Dalsgaard, P. W., Linnet, K., & Barron, L. P.	2018	Prediction of collision cross section and retention time for broad scope screening in gradient reversed-phase liquid chromatography-ion mobility-high resolution accurate mass spectrometry	LC	Acquity UPLC HSS C18	Mili Q water and acetonitrile with formic acid and ammonium formiate	Water Xevo G2-S QTOF with VION IMS	ESI	PI	4 eV (low energy) and ramped from 10 to 40 eV (high energy)			• Scan range: 50-950 full MS & 50-950 MS/MS • Scan range: Scan time 0.2 s • Inclusion list (predicted metabolites) • 5 most intes¡nse ions at each scan if no mass from the inclusion list was found • Dynamic exclusion: 10 s	Ion mobility (System 2) was calibrated with a Major Mix IMS/Tof Calibration Kit from Waters. QTOF WAS CALIBRATED with 5 mM sodium formate solution in propanol: water (90:10, v/v). Lock mass was used with leucine enkephalin as a reference mass at m/z 556.2766 on both systems.
Oberacher, H., Reinstadler, V., Kreidl, M., Stravs, M. A., Hollender, J., & Schymanski, E. L.	2019	Annotating nontargeted lc-hrms/ms data with two complementary tandem mass spectral libraries	LC	Kinetex Biphenyl Luna C18 (2.1 x 100 mm, 2.6 µm)	Acetonitrile and MeOH with acetic acid	Sciex TripleTOF 5600+	ESI	oi	35 ± 15 eV (high energy)	30000 (Full MS) & 15000 (MS/MS)	IDA & DDA	• Scan range: 100-7000 full MS & 50-700 MS/MS • 1 M Full MS (100 ms accumulation time) followed by eight dependent MS/MS scans (accumulation time 100 ms each) • Intensity threshold of 100 cps • Dynamic background substraction •Former target ions were excluded for 30 s after two occurrences	APCI positive calibration solution delivered via a calibration delivery system (Sciex).
Ruttkies, C., Schymanski, E. L., Strehmel, N., Hollender, J., Neumann, S., Williams, A. J., & Krauss, M.	2019	Supporting non-target identification by adding hydrogen deuterium exchange MS/MS capabilities to MetFrag	LC	Kinetex C18 EVO (3.0 x 100 mm, 2.6 µm)	Mili Q water and acetonitrile with formic acid & deuterium oxide and tetradeuteromethanol	Thermo LTQ Orbitrap XL	ESI	PI & NI	nomical collision energy of 100 (low energy) and normalized CE 35 (high energy)	15000 (m/z 2000, MS/MS)	DDA	• 1.3 m/z isolation MS/MS width
Seiwert, B., Klöckner, P., Wagner, S., & Reemtsma, T.	2020	Source-related smart suspect screening in the aqueous environment: search for tire-derived persistent and mobile trace organic contaminants in surface waters	LC	ACQUITY UPLC HSS T3 (2.1 x 100 mm, 1.8 µm)	Mili Q water, MeOH with formic acid	Water Xevo G2-S QTOF	ESI		6 eV (low energy) and 15–40 eV (high energy)		DIA& DDA	• Scan range: 50-1200 full MS & 50-1200 MS/MS • Centroid mode • DDA: inclustion list related to pollution source	To ensure accurate mass precision during MS analysis, leucine encephalin was infused via the reference probe as lockspray
Singh, R. R., Chao, A., Phillips, K. A., Xia, X. R., Shea, D., Sobus, J. R., ... & Ulrich, E. M.	2020	Expanded coverage of non-targeted LC-HRMS using atmospheric pressure chemical ionization: a case study with ENTACT mixtures	LC	Hypersil GOLD aQ C18 (2.1 x 200 mm, 1.9 µm)	Mili Q water and MeOH with ammonium formiate and formic acid	Thermo Q-Exactive Plus Orbitrap	HESI and APCI			70000 (200 m/z Full MS)		• Scan range: 100-1500 full MS
Ulrich, E. M., Sobus, J. R., Grulke, C. M., Richard, A. M., Newton, S. R., Strynar, M. J., ... & Williams, A. J.	2019	EPA’s non-targeted analysis collaborative trial (ENTACT): genesis, design, and initial findings	GC X GC	Restek Rxi-5 ms (0.25 mm x 30 m, 0.25 µm) and Restek Rxi-17Sil MS (0.25 mm x 0.6 m, 0.25 µm)	Helium	Leco HRT+ ToF	EI
Ulrich, E. M., Sobus, J. R., Grulke, C. M., Richard, A. M., Newton, S. R., Strynar, M. J., ... & Williams, A. J.	2019	EPA’s non-targeted analysis collaborative trial (ENTACT): genesis, design, and initial findings	GC	VF-5MS (0.25 mm x 30 m, 0.25 µm)	Helium	Agilent 7010 QqQ	EI	PI
Ulrich, E. M., Sobus, J. R., Grulke, C. M., Richard, A. M., Newton, S. R., Strynar, M. J., ... & Williams, A. J.	2019	EPA’s non-targeted analysis collaborative trial (ENTACT): genesis, design, and initial findings	GC	HP-5 ms Ultra Inert (30 m × 0.25 mm × 0.25 μm)	Helium	Agilent ToF	EI
Ulrich, E. M., Sobus, J. R., Grulke, C. M., Richard, A. M., Newton, S. R., Strynar, M. J., ... & Williams, A. J.	2019	EPA’s non-targeted analysis collaborative trial (ENTACT): genesis, design, and initial findings	LC	Zorbax Eclipse Plus C8 (2.1 x 50 mm, 1.8 µm)	Mili Q water and MeOH with ammonium formiate	Agilent 6530 QToF	ESI	PI & NI	10,20,40 (high energy)		DDA	• Scan range: 50-1700 full MS & 50-1700 MS/MS • Adquisition time: 3 spectra/s (Full MS) & 333.3 ms/spectra (MS/MS) • Intensity threshold of 10000 cps
Ulrich, E. M., Sobus, J. R., Grulke, C. M., Richard, A. M., Newton, S. R., Strynar, M. J., ... & Williams, A. J.	2019	EPA’s non-targeted analysis collaborative trial (ENTACT): genesis, design, and initial findings	LC	ZORBAX Eclipse Plus C18 (2.1 x 100 mm, 1.8 µm)	Mili Q water, MeOH with ammonium acetate and acetic acid	Agilent 6530 QToF	ESI	PI & NI	10,20,40 (high energy)		DDA	• Scan range: 50-1700 full MS & 50-1700 MS/MS • Adquisition time: 3 spectra/s (Full MS) & 333.3 ms/spectra (MS/MS) • Intensity threshold of 10000 cps
Ulrich, E. M., Sobus, J. R., Grulke, C. M., Richard, A. M., Newton, S. R., Strynar, M. J., ... & Williams, A. J.	2019	EPA’s non-targeted analysis collaborative trial (ENTACT): genesis, design, and initial findings	LC	Zorbax RRHD Eclipse Plus C18 (2.1 x 150 mm, 1.8 µm)	Mili Q water and acetonitrile with formic acid	Agilent 6530 QToF	ESI	PI & NI	10,20,40 (high energy)		DDA	• Scan range: 50-1700 full MS & 50-1700 MS/MS • Adquisition time: 3 spectra/s (Full MS) & 333.3 ms/spectra (MS/MS) • Intensity threshold of 10000 cps
Ulrich, E. M., Sobus, J. R., Grulke, C. M., Richard, A. M., Newton, S. R., Strynar, M. J., ... & Williams, A. J.	2019	EPA’s non-targeted analysis collaborative trial (ENTACT): genesis, design, and initial findings	LC	Zorbax Eclipse Plus C18 (2.1 x 100 mm, 1.8 µm)	Mili Q water, MeOH with ammonium acetate	Agilent 6530 QToF	ESI	PI & NI	10,20,40 (high energy)		DDA	• Scan range: 50-1700 full MS & 50-1700 MS/MS • Adquisition time: 3 spectra/s (Full MS) & 333.3 ms/spectra (MS/MS) • Intensity threshold of 10000 cps
Ulrich, E. M., Sobus, J. R., Grulke, C. M., Richard, A. M., Newton, S. R., Strynar, M. J., ... & Williams, A. J.	2019	EPA’s non-targeted analysis collaborative trial (ENTACT): genesis, design, and initial findings	LC			IM-QToF	ESI &APPI	PI & NI				• Scan range: 50-1700 full MS & 50-1700 MS/MS • Adquisition time: 3 spectra/s (Full MS) & 333.3 ms/spectra (MS/MS) • Intensity threshold of 10000 cps
Ulrich, E. M., Sobus, J. R., Grulke, C. M., Richard, A. M., Newton, S. R., Strynar, M. J., ... & Williams, A. J.	2019	EPA’s non-targeted analysis collaborative trial (ENTACT): genesis, design, and initial findings	LC	XSelect HSS T3 (3 x 150 mm, 3.5 µm)	Mili Q water and acetonitrile with formic acid	Bruker maXis II TOF &, Bruker maXis II UHR QTOF	ESI &APPI	PI	35 (high energy)		DDA	• Scan range: 50-1700 full MS & 50-1700 MS/MS • Adquisition time: 3 spectra/s (Full MS) & 333.3 ms/spectra (MS/MS) • Intensity threshold of 10000 cps
Ulrich, E. M., Sobus, J. R., Grulke, C. M., Richard, A. M., Newton, S. R., Strynar, M. J., ... & Williams, A. J.	2019	EPA’s non-targeted analysis collaborative trial (ENTACT): genesis, design, and initial findings	LC	UPLC BEH C18 (2.1 x 50 mm, 1.7 µm)	Mili Q water and MeOH with ammonium formiate	Waters Xevo G2-XS QToF	ESI	PI & NI	4 eV (low energy) & and ramped from 10 to 45eV (high energy)		DIA	• Scan range: 50-1700 full MS & 50-1700 MS/MS • Adquisition time: 3 spectra/s (Full MS) & 333.3 ms/spectra (MS/MS) • Intensity threshold of 10000 cps
Ulrich, E. M., Sobus, J. R., Grulke, C. M., Richard, A. M., Newton, S. R., Strynar, M. J., ... & Williams, A. J.	2019	EPA’s non-targeted analysis collaborative trial (ENTACT): genesis, design, and initial findings	LC	Thermo Accucore C30 (150 × 2.1 mm, 2.6 μm)	Water, acetonitrile, isopropanol, formic acid	Thermo Q Exactive Orbitrap	HESI	PI & NI	30, 60 (high energy)		DDA	• Scan range: 50-1700 full MS & 50-1700 MS/MS • Adquisition time: 3 spectra/s (Full MS) & 333.3 ms/spectra (MS/MS) • Intensity threshold of 10000 cps
Ulrich, E. M., Sobus, J. R., Grulke, C. M., Richard, A. M., Newton, S. R., Strynar, M. J., ... & Williams, A. J.	2019	EPA’s non-targeted analysis collaborative trial (ENTACT): genesis, design, and initial findings	LC	ACE Excel C18-PFP (125 × 3 mm, 2 μm)	Water, acetonitrile, formic acid or ammonium hydroxide	Thermo Q Exactive Orbitrap	ESI & APCI	PI & NI	15, 30, 45 (high energy)		DDA	• Scan range: 50-1700 full MS & 50-1700 MS/MS • Adquisition time: 3 spectra/s (Full MS) & 333.3 ms/spectra (MS/MS) • Intensity threshold of 10000 cps
Ulrich, E. M., Sobus, J. R., Grulke, C. M., Richard, A. M., Newton, S. R., Strynar, M. J., ... & Williams, A. J.	2019	EPA’s non-targeted analysis collaborative trial (ENTACT): genesis, design, and initial findings	LC	Waters XBridge BEH C18 (50 × 2.1 mm, 3.5 μm)	Water, methanol, formic acid	Thermo Q Exactive Orbitrap	HESI	PI & NI	normalized CE 50 (high energy)		DDA	• Scan range: 50-1700 full MS & 50-1700 MS/MS • Adquisition time: 3 spectra/s (Full MS) & 333.3 ms/spectra (MS/MS) • Intensity threshold of 10000 cps
Ulrich, E. M., Sobus, J. R., Grulke, C. M., Richard, A. M., Newton, S. R., Strynar, M. J., ... & Williams, A. J.	2019	EPA’s non-targeted analysis collaborative trial (ENTACT): genesis, design, and initial findings	LC	Thermo Hypersil GOLD aQ C18 Polar Endcapped (100 × 2.1 mm, 1.9 μm)	Water, acetonitrile, formic acid	Thermo Q Exactive Orbitrap	HESI	PI & NI	stepped 30 (high energy)		DIA	• Scan range: 50-1700 full MS & 50-1700 MS/MS • Adquisition time: 3 spectra/s (Full MS) & 333.3 ms/spectra (MS/MS) • Intensity threshold of 10000 cps
Ulrich, E. M., Sobus, J. R., Grulke, C. M., Richard, A. M., Newton, S. R., Strynar, M. J., ... & Williams, A. J.	2019	EPA’s non-targeted analysis collaborative trial (ENTACT): genesis, design, and initial findings	LC	Waters Atlantis T3 (150 × 3 mm, 3 μm)	Water, acetonitrile, formic acid	Thermo Q Exactive Plus Orbitrap	ESI	PI & NI	15-120 (DIA) & 20, 50, 90 (DDA)		DIA & DDA	• Scan range: 50-1700 full MS & 50-1700 MS/MS • Adquisition time: 3 spectra/s (Full MS) & 333.3 ms/spectra (MS/MS) • Intensity threshold of 10000 cps
Veenaas, C., Bignert, A., Liljelind, P., & Haglund, P.	2018	Nontarget Screening and Time-Trend Analysis of Sewage Sludge Contaminants via Two-Dimensional Gas Chromatography-High Resolution Mass Spectrometry	GC X GC	DB5ms-UI (0.25 mm x 30 m, 0.25 µm) and Quadrex 007-65HT (0.25 mm x 1.6 m, 0.10 µm)	Helium	Agilent 7250 TOF	EI		15 eV and 70 eV	>25000		• Scan range: 38-800 full MS	n n-alkane mixture was injected every tenth sample and analyzed to calibrate
Sörengård, M., Ahrens, L., Alygizakis, N., Jensen, P. E., & Gago-Ferrero, P.	2020	Non-target and suspect screening strategies for electrodialytic soil remediation evaluation: Assessing changes in the molecular fingerprints and per- and polyfluoroalkyl substances (PFASs)	LC	Zorbax Eclipse XDB C18 (4.6 x 150 mm, 5 µm)	Mili Q water and acetonitrile with ammonium formiate and formic acid	Thermo LTQ-Orbitrap Velos™		PI & NI	4 eV (low energy) and normalized CE 35 eV (high energy)	60000 (Full MS)	DIA	• Scan range: 60-900 full MS & 60-900 MS/MS
Wang, Y., Yu, N., Zhu, X., Guo, H., Jiang, J., Wang, X., ... & Wei, S.	2018	Suspect and Nontarget Screening of Per- and Polyfluoroalkyl Substances in Wastewater from a Fluorochemical Manufacturing Park	LC	BEH C18 (2.1 x 50 mm, 2.5 µm)	Acetonitrile, Mili Q water and MeOH with ammonium acetate	Sciex Qtof 5600	ESI	NI	10 eV (low energy)	30000	DDA	• Scan range: 50-1250 full MS & 30-1250 MS/MS • 1 scan Full MS/MS & 20 MS/MS in one cycle • Intensity threshold of 100 cps • Exclude isotopes withing 4 DA • 1 candidate to monitor per cycle
Wang, Y., Luo, C., Yang, M., Ren, J., Wang, W., Yong, L., ... & Xiaoli, Z.	2020	Target quantification and semi-target screening of halogenated carboxylic acids in drinking water using ultra-high performance liquid chromatography-quadrupole orbitrap high-resolution mass spectrometry	LC	CSH C18 (2.1 x 50 mm, 2.5 µm) and HSS T3 (2.1 x 50 mm, 2.5 µm)	Mili Q water and acetonitrile with acetic acid	Thermo Q-Exactive™ Plus	HESI	NI	normalized CE at 10, 30 and 60 (high energy)	70000 (m/Z 62-320, Full MS) % 17500 (MS/MS)	DDA	• Scan range: 50-1250 full MS & 30-1250 MS/MS • Inclusion list • Intensity threshold of 1000 cps • Dynamix exclusion at 12 s	The mass calibration was carried out on the instrument every three days using the Pierce ESI negative ion calibration solution. It should be noted that the customized calibration also needed to be done, following the conventional calmix calibration, for achieving higher mass accuracy. Considering the low molecular weight for HCAs, three negative ions, whose m/z (59.01385, 265.14790 and 514.28440)…
Xiao, F., Golovko, S. A., & Golovko, M. Y.	2017	Identification of novel non-ionic, cationic, zwitterionic, and anionic polyfluoroalkyl substances using UPLC–TOF–MSE high-resolution parent ion search	LC	BEH Shield RP18 (2.1 x 100 mm, 1.7 µm)	Mili Q water and MeOH with ammonium formiate	Water Synapt G"-S, QToF	ESI	PI & NI	10 to 25 eV	10000 (M/Z 554)	DIA & DDA	• Scan range: 50-1250 full MS & 30-1250 MS/MS • DDA: Inclusion list & DIA: MSE • Adquisition time of 0.1 s	Leucine enkephalin (400 pg/μL) was infused at a rate of 10 μL/min for mass correction.
Samanipour, S., Reid, M. J., Bæk, K., & Thomas, K. V.	2018	Combining a Deconvolution and a Universal Library Search Algorithm for the Nontarget Analysis of Data-Independent Acquisition Mode Liquid Chromatography-High-Resolution Mass Spectrometry Results	LC	Acquity BEH C18 (2.1 x 100 mm, 1.7 µm)	Mili Q water and MeOH with ammonium acetate	Waters Xevo G2S QToF	ESI	PI & NI	6 rV (low energy) & CE ramped between 15 and 45 eV (high energy)	35000	DIA	• Scan range: 50-850 full MS • Sampling frecuency of 2.7 Hz.
Ruiz-Delgado, A., Plaza-Bolaños, P., Oller, I., Malato, S., & Agüera, A.	2020	Advanced evaluation of landfill leachate treatments by low and high-resolution mass spectrometry focusing on microcontaminant removal	LC & GC	Poroshell 120 EC-C18 (4.6 x 50 mm, 2.7 µm) and HP-5MS UI (0.25mm x 30 m, 0.25 µm)	Mili Q water and acetonitrile with ammonium formiate and formic acid	Sciex 5600 QToF 6 Agilent 5977 quadrupole-MS (GC)	ESI (LC)& EI (GC)	PI & NI	30 eV with a ±15 eV (LC) & 70 eV (GC)	30000 (MS/MS, LC)	DDA	• Scan range: 100-2000 full MS (LC) & 40-500 ( Full MS, GC) • 1 scan Full MS/MS & 4 MS/MS in one cycle •GC: NIST library 2.2 (Ed. 2014).
Plassmann, M. M., Fischer, S., & Benskin, J. P.	2018	Nontarget Time Trend Screening in Human Blood	LC	Hypersil GOLD aQ (4.6 x 50 mm, 2.7 µm)	Mili Q water and acetonitrile with formic acid	Thermo Q Exactive HF Orbitrap	HESI	PI & NI	normalized CE 30, 70 and 120 % (high energy)	120000 (m/z 200, Full MS) & 15000 ( m/z 200, MS/MS)	DDA	• Scan range: 100-1000 (full MS)& 100-1000 (MS/MS) • Inclusion list created based on features increasing over the time series •GC: NIST library 2.2 (Ed. 2014).
Nürenberg, G., Schulz, M., Kunkel, U., & Ternes, T. A.	2015	Development and validation of a generic nontarget method based on liquid chromatography - high resolution mass spectrometry analysis for the evaluation of different wastewater treatment options	LC	Zorbax Eclipse Plus C18 (2.1 x 150 mm, 3.5 µm)	Mili Q water and acetonitrile with formic acid	Sciex 5600 QToF	ESI	PI & NI			DIA	• Scan range: 100-1200 (full MS)& 100-1000 (MS/MS) • Accumulation tome of 0.2 s (Full MS) & 0.05 s (MS/MS) •GC: NIST library 2.2 (Ed. 2014).	The mass spectrometer was recalibrated automatically after five measurements using an automated calibrant delivery system (CDS) via atmospheric pressure chemical ionization (APCI).
