# Supplementary material for: Suspect and non-target screening: the last frontier in environmental analysis
Source: Royal Society of Chemistry journal article supplement (doi:10.1039/d1ay00111f), 2021-01-01
Supplement: d1ay00111f3.xlsx [file d1ay00111f3.xlsx]

## Sheet: Hoja1
Reference	Year	DOI	Application	Acquisition mode	Software	RT align	Peak Peak, componentization	Identification databases, libraries and in-silico fragmentation tools	Enough info provided	Comments
Alygizakis et al.	2019	10.1016/j.jhazmat.2018.08.073	Wastewater	DDA, DIA	XCMS	Obi-Warp	centWave, CAMERA	GenForm, MetFrag, MassBank, ChemSpider, Pubchem	YES
Assress et al.	2019	10.1016/j.envpol.2019.07.075	Wastewater	FullMS-ddMS2	DataAnalysis	DataAnalysis	DataAnalysis	KEGG,CHEMI, HMDB, FOR-IDENT, Metfrag, Metfusion	Black Box
Bader et al.	2016	10.1016/j.aca.2016.06.030	Data evaluation	DDA	MarkerView	MarkerView	MarkerView	-	YES
Bader et al.	2017	10.1021/acs.analchem.7b03037	Data evaluation	QTOF-FS (survey scans)	MarkerView + Own script	MarkerView + Own script	MarkerView + Own script		YES
Beckers et al.	2020	10.1016/j.scitotenv.2020.138388	River water	FullMS-ddMS2	MzMine/R non-target		R-nontarget/MzMine	ChemSpider, CompTox, MassBank	YES
Bergé et al.	2018	10.1016/j.chemosphere.2018.09.101	Wastewater	FullMS-ddMS2	DataAnalysis	ProfileAnalysis	DataAnalysis (FMF alg)	PesticideScreener 2.0, ToxScreener	YES
Brüggen and Schmitz	2018	10.1007/s41664-018-0081-5	Wastewater	FullMS-ddMS2, DIA(SWATH)	Master View		Master View + PCA	MassBank, ChemSpider	Black Box
Brunner et al.	2019	10.1016/j.chemosphere.2018.09.140	Water monitoring	FullMS-ddMS2	Compound Discoverer	Compound Discoverer	Compound Discoverer	In-house, EnviPath	Black Box
Campos-Mañas et al.	2019	10.1016/j.chemosphere.2019.05.147	Agro wastewater	FullMS-ddMS2	Master View		Master View	NORMAN, PathPred, EAWAG-BDD, MassBank	Black Box
Carpenter et al.	2019	10.1021/acs.est.8b05320	River water	FullMS-ddMS2	enviMass	enviMass	enviMass	RMassBank, Rgenform, MetFrag, PubCHem	YES
Chiaia-Hernandez et al.	2013	10.1021/es303888v	Lake sediments	FullMS-ddMS2	-	-	-	MassFrontier, TP in-house finder	NO
Chiaia-Hernandez et al.	2014	10.1007/s00216-014-8166-0	Lake sediments	FullMS-ddMS2	envimass	envimass	Formulator	MOLGEN, MetFrag, ChemSpider,MassBankm PubChem	YES
Chiaia-Hernandez et al.	2017	10.1021/acs.est.7b03357	Lake sediments	FullMS-ddMS2/DIA	envimass R package	ProteoWizard	enviMass	MetFrag, Chemspider, MoNA, PubMed	YES
Choi et al.	2019	10.1016/j.envpol.2019.113792	Arctic wastewater	FullMS-ddMS2	Compound Discoverer	Compound Discoverer	Compound Discoverer	EFS HRAM, MZCloud	Black Box
Chung et al.	2017	10.1016/j.jes.2017.06.036	Passive air water	QTOF-FS	ChromaTOF	ChromaTOF	ChromaTOF	NIST	NO
Di Marcantonio et al.	2020	10.1016/j.chemosphere.2020.127630	Drinking water	FullMS-ddMS2	Compound Discoverer	Compound Discoverer	Compound Discoverer	In-house, mzCloud, EAWAG, DSSTox_V2, ChemSpider	Black Box
Dom et al.	2018	10.3390/toxins10090375	Toxins in seafood	FullMS-ddMS2	MarkerView	MarkerView	MarkerView	ChemSpider, PubChem	Black Box
Du et al.	2017	10.1039/C7EM00243B	Runoff water and fish	FullMS-ddMS2	MassHunter	MassHunter	MassHunter	In-house, MetLin	Black Box
Emke et al.	2018	10.1016/j.forsciint.2018.03.019	Wastewater	FullMS-ddMS2	-	-	-	-	NO
Gago-Ferrero et al.	2015	10.1021/acs.est.5b03454	Wastewater	QTOF-FS	DataAnalysis	DataAnalysis	DataAnalysis	MOLGEN, MassBank, ChemSpider, PubChem
Gago-Ferrero et al.	2018	10.1021/acs.est.7b06598	Data evaluation	QTOF-FS	DataAnalysis	DataAnalysis	DataAnalysis	Swedish product register database, MassBank, ChemSpider		Prioritization by filtering with the Swedish register product Database
Gerona et al.	2018	10.1038/jes.2017.28	Human serum	FullMS-ddMS2	MassHunter	MassHunter	MassHunter	In-house	Black Box
Giorio et al.	2019	10.1016/j.chemosphere.2019.02.151	Urban aerosols	FullMS-ddMS2	Mathematica	-	Mathematica	-	NO
Grung et al.	2017	10.1016/j.jhazmat.2016.05.036	Urban aerosols	QTOF-FS	MassLynx	-	-	NIST
Hedgespeth et al.	2019	10.1016/j.scitotenv.2019.07.184	River water	QTOF-FS	MassHunter	MassHunter	MassHunter	DSSTox_V2	Black Box
Hug et al.	2014	10.1016/j.envpol.2013.07.048	Wastewater	FullMS-ddMS2	MzMine/R non-target		R-nontarget/MzMine	MetFrag, ChemSpider, Jchem	YES
Jeon et al.	2019	10.1016/j.ecoenv.2019.109513	Biotransformation in fish	FullMS-ddMS2	SIEVE	SIEVE	SIEVE	MassFrontier, MetFrag, Massbank	Black Box
Kaserzon et al.	2017	10.1016/j.chemosphere.2017.05.071	Drinking water	FullMS-ddMS2/DIA (SWATH)	PeakView (SCIEX)	-	-	MS Library (SCIEX)	NO
Kiss et al.	2016	10.1007/s11356-017-0748-x	Wastewater	FullMS-ddMS2	DataAnalysis	DataAnalysis	DataAnalysis	MassBank	Black Box
Lara-Martin et al.	2020	10.1021/acs.est.9b06114	Wastewater and marine	FullMS-ddMS2	Compound Discoverer	Compound Discoverer	Compound Discoverer	MetFrag, Chemspider, NORMAN, PubMed	Black Box	Combined with R, PCA and HCA to priorize
Lopez et al.	2016	10.1016/j.talanta.2016.07.065	Human urine	FullMS-ddMS2	MzMine	MzMine	MzMine	-	YES
Miaz et al.	2020	10.1039/C9EM00502A	Human serum	FullMS-ddMS2	Compound Discoverer	Compound Discoverer	Compound Discoverer	mzCloud, MetFrag	Black Box
Newton et al.	2018	10.1016/j.envpol.2017.11.033	Drinking water	FullMS-ddMS2	MassHunter	MassHunter	MassHunter	DSSTox_V2	Black Box
Nika et al.	2017	10.1016/j.jhazmat.2016.03.035	Wastewater	FullMS-ddMS2	-	-	-	EAWAG, Metabolite Predict Software	NO
Nüremberg et al.	2015	10.1016/j.chroma.2015.11.014	Wastewater	FullMS-ddMS2	MarkerView, R Non-target	MarkerView	PeakView (Sciex), R Non-target	In-house	YES
Park et al.	2018	10.1016/j.scitotenv.2018.05.081	River water	FullMS-ddMS2	Compound Discoverer	Compound Discoverer	Compound Discoverer	mzCloud, MassBank, MetFrag	Black Box
Parry et al.	2016	10.1016/j.watres.2016.07.056	Wastewater	QTOF-FS	MassHunter	MassHunter	MassHunter	In-house	Black Box
Pena-Abaurrea et al.	2014	10.1021/es5018152	Lake sediments	QTOF-FS	Own Script in C	Own Script in C	Own Script in C	in-house	YES
Peter et al.	2018	10.1021/acs.est.8b03287	Water and fish	FullMS-ddMS2	MassHunter	MassHunter	MassHunter	Profinder, In-house	Black Box
Peter et al.	2019	10.1016/j.watres.2018.11.050	Treated water	FullMS-ddMS2	MassHunter	MassHunter	MassHunter	MassHunter, In-house	Black Box
Piras et al.	2020	10.1016/j.chemosphere.2019.124635	Wastewater	DIA	UNIFI	UNIFI	UNIFE	UNIFI(i-FIT), PubCHEM/Chemspider, In-silico UNIFI	Black Box
Plassman et al.	2016	10.1007/s00216-016-9563-3	Data evaluation (biological samples)	QTOF-FS	TracMass2 (MATLAB)	TracMass2 (MATLAB)	TracMass2 (MATLAB)	-	YES
Plassman et al.	2018	10.1021/acs.estlett.8b00196	Human blood	FullMS-ddMS2	Compound Discoverer	Compound Discoverer	Compound Discoverer	mzCloud, MetFrag, KEMI, NORMAN	Black Box
Rager et al.	2016	10.1016/j.envint.2015.12.008	Dust	QTOF-FS	MassHunter		MassHunter MFE	DSSTox_V2	NO
Roback et al.	2018	10.1039/C8EW00401C	Drinking water	FullMS-ddMS2	MassHunter	-	MassHunter	MassHunter, In-house	NO
Samanipour et al.	2019	10.1016/j.talanta.2018.11.039	Data evaluation (drinking water)	FullMS-ddMS2	Sciex OS	Sciex OS	Sciex OS	In-house	Black Box
Schollée et al.	2015	10.1021/acs.analchem.5b02905	Wastewater	FullMS-ddMS2	R Non-target	enviMass	enviPick	MetFrag, MetFusion, Massbank, GenForm	YES
Schollée et al.	2018	10.1016/j.watres.2018.05.045	Wastewater	FullMS-ddMS2	envimass R package	enviMass	enviPick	TPPrioritizR	YES	Transformation product identification toolbox
Schymanski et al.	2014	10.1021/es4044374	Data evaluation (wastewater)	FullMS-ddMS2	enviMass, R non-target	R-nontarget	envimass	MOLGEN, MetFusion, ChemSpider, MassBank	YES
Seiwert et al.	2020	10.1007/s00216-020-02653-1	Data evaluation (wastewater)	DIA	MarkerLynx	MarkerLynx	MarkerLynx	MassLynx	Black Box
Singer et al.	2016	10.1021/acs.est.5b03332	Wastewater	FullMS-ddMS2	envimass R package	enviMass		in-house	YES
Sörengard et al.	2020	10.1016/j.jece.2020.104437	Soil remediation	DIA	XCMS		centWave
Soulier et al.	2016	10.1016/j.scitotenv.2016.01.056	Ground water	QTOF-MSE	MarkerLynx	-	MarkerLynx	in-house	NO	PCA to find markers of each condition
Terzic and Ahel	2011	10.1016/j.envpol.2010.10.009	Sediments	FullMS-ddMS2	MassLynx	-	-	MassLynx, ChemSpider, in-house	NO
Tian et al.	2020	10.1021/acs.est.9b06126	River water	FullMS-ddMS2	MussHunter	MussHunter	MussHunter	MassHunter, ToxCast, NORMAN	Black Box
Veenaas et al.	2018	10.1021/acs.est.8b01126	Sewage sludge	FullMS-ddMS2	Python Script	Guineu	Python Script	NIST, MetFrag, ChemSpider	YES
Wang et al.	2018	10.1021/acs.est.8b03030	Wastewater	FullMS-ddMS2	PeakView (Sciex) + MATLAB Own Script	-	PeakView (Sciex)	CompTox, MassBank	NO
Jia et al.	2018	10.1016/j.foodchem.2017.06.143	Fish	FullMS-ddMS2, AIF, vDIA	XCMS	-	centWave	Molfile	YES
Xiao et al.	2017	10.1016/j.aca.2017.08.016	Commertial surfactants	QTOF-MSE	MassLynx	-	-	MassLynx	NO
Zhang et al.	2020	10.1016/j.trac.2020.116052	Passive air	FullMS	XCMS	XCMS	XCMS	NORMAN	YES	Own Prio strategy script to detect chlorinated and brominated compounds
Li et al.	2018	10.1039/C7EM00552K	Wastewater	FullMS-ddMS2	Compound Discoverer	Compound Discoverer	Compound Discoverer	mzCloud	Black Box	Talked about QC with calibration samples
